# Supplementary material for: Stable isotope ratio analysis of carbon to distinguish sialic acid from freshly stewed bird's nest products
Source: Royal Society of Chemistry journal article supplement (doi:10.1039/d2ay01152b), 2022-01-01
Supplement: d2ay01152b1.pdf [file d2ay01152b1.pdf]

**Table S1** Details of pure sialic acid purchased from e-commerce platforms, with information taken from platform publicity. “/” mean: no information available there.

| Sample                              | Synthesis method | Purity | Country |
|-------------------------------------|------------------|--------|---------|
| Commercial SA 1                     | Fermentation     | 99%    | China   |
| Commercial SA 2                     | Fermentation     | 98%    | China   |
| Commercial SA 3                     | Fermentation     | 98%    | China   |
| Commercial SA 4                     | Enzymes          | 98%    | China   |
| Commercial SA 5                     | Enzymes          | 98%    | China   |
| N-Acetylneuraminic Acid Solid Drink | /                | 98%    | China   |

**Table S2** Sample details of each tin of freshly braised bird's nest.

| Sample                     | Years | Ingredient list                                               | Country  |
|----------------------------|-------|---------------------------------------------------------------|----------|
| Freshly stew bird's nest 1 | 2020  | Bird's nest, crystal Sugar, water                             | China    |
| Freshly stew bird's nest 2 | 2021  | Bird's nest, crystal Sugar, water                             | China    |
| Freshly stew bird's nest 3 | 2021  | Bird's nest, crystal Sugar, water                             | China    |
| Freshly stew bird's nest 4 | 2020  | Bird's nest, crystal Sugar, water                             | China    |
| Freshly stew bird's nest 5 | 2020  | Water, crystal Sugar, Marine Fish Collagen, bird's nest, agar | China    |
| Freshly stew bird's nest 6 | 2020  | Bird's nest, crystal Sugar, water                             | Malaysia |

**Table S3.** Fermentation data were recorded simulating the sugar and sialic acid concentrations in freshly stewed bird's nest samples. 0.03 g of sialic acid consisted of  $\delta^{13}\text{C}$  values of -28.17‰ and -12.91‰ pure sialic acid in the proportions of 0%, 25%, 75% and 100% respectively.

|            | A1    | A2    | B1     | B2     | C1     | C2     | D1     | D2     | E1     | E2     |
|------------|-------|-------|--------|--------|--------|--------|--------|--------|--------|--------|
| Glucose(g) | 6.08  | 6.05  | 6.12   | 6.09   | 6.08   | 6.10   | 6.07   | 6.02   | 6.04   | 6.07   |
| SA(g)      | 0.03  | 0.03  | 0.0225 | 0.0225 | 0.0150 | 0.0150 | 0.0074 | 0.0075 | 0.0302 | 0.0301 |
|            |       |       | 5      | 0      | 0      | 0      | 5      | 5      |        |        |
| Water(mL)  | 100   | 100   | 100    | 100    | 100    | 100    | 100    | 100    | 100    | 100    |
| Yeast(g)   | 0.202 | 0.205 | 0.209  | 0.203  | 0.209  | 0.210  | 0.201  | 0.201  | 0.201  | 0.205  |

---

|                    |     |       |     |     |     |     |     |     |       |       |
|--------------------|-----|-------|-----|-----|-----|-----|-----|-----|-------|-------|
| Initial Brix       | 5   | 5.2   | 5   | 5.9 | 5   | 5   | 5   | 5   | 5.2   | 5     |
| Final Brix         | 1.2 | 2     | 1.5 | /   | 1.5 | 1.4 | 2   | 2   | 1.8   | 1.3   |
| Sugar removal rate | 76% | 60.2% | 70% | /   | 70% | 72% | 60% | 60% | 65.4% | 72.8% |

---
